# Supplementary material for: Differential Proteomics Reveals miR-155 as a Novel Indicator of Liver and Spleen Pathology in the Symptomatic Niemann-Pick Disease, Type C1 Mouse Model
Source: MDPI journal article supplement (doi:10.3390/molecules24050994), 2019-03-12
Supplement: s1 [file s1]

**miR-155 is a novel indicator of liver and spleen pathology in the symptomatic Niemann-Pick  
disease, type C1 mouse model**

Melissa R. Pergande<sup>1</sup>, Antony Cougnoux<sup>2</sup>, Rathnayake A. C. Rathnayake<sup>1</sup>, Forbes D. Porter<sup>2</sup> and  
Stephanie M. Cologna<sup>1,3</sup>

**Affiliations:**

1. Department of Chemistry, University of Illinois at Chicago, Chicago, IL 60607, USA
2. Division of Translational Medicine, *Eunice Kennedy Shriver* National Institute of Child Health and Human Development, Bethesda, MD 20879, USA.
3. Laboratory for Integrative Neuroscience, University of Illinois at Chicago, Chicago, IL 60607, USA

**Keywords:** Niemann-Pick, type C1, spleen proteomics, AJS-ESI mass spectrometry, lysosomal storage disorder, miR-155

**Correspondence:**

Stephanie M. Cologna, Ph.D.

Assistant Professor

Department of Chemistry and Laboratory for Integrative Neuroscience

University of Illinois at Chicago

P: 312-413-2762

E: [cologna@uic.edu](mailto:cologna@uic.edu)

### Primers for qRT-PCR analysis of microRNAs

| Primer name             | Primer sequence                                             |
|-------------------------|-------------------------------------------------------------|
| U6 snRNA-RT             | 5'-AACGCTTCACGAATTTGCGT-3'                                  |
| U6 snRNA-Forward primer | 5'-CTCGCTTCGGCAGCACA-3'                                     |
| U6 snRNA-Reverse primer | 5'-AACGCTTCACGAATTTGCGT-3'                                  |
| MiR155-RT primer        | 5'-GTCGTATCCAGTGCAGGGTCCGAGGTATTCGCACTGGATACGACACCC<br>C-3' |
| MiR155-Forward primer   | 5'-GACTGTTAATGCTAATCGTGATAG-3'                              |
| MiR155-Reverse primer   | 5'-GTGCAGGGTCCGAGGTATTC-3'                                  |

**Table S1: Primers used for microRNA analysis.**

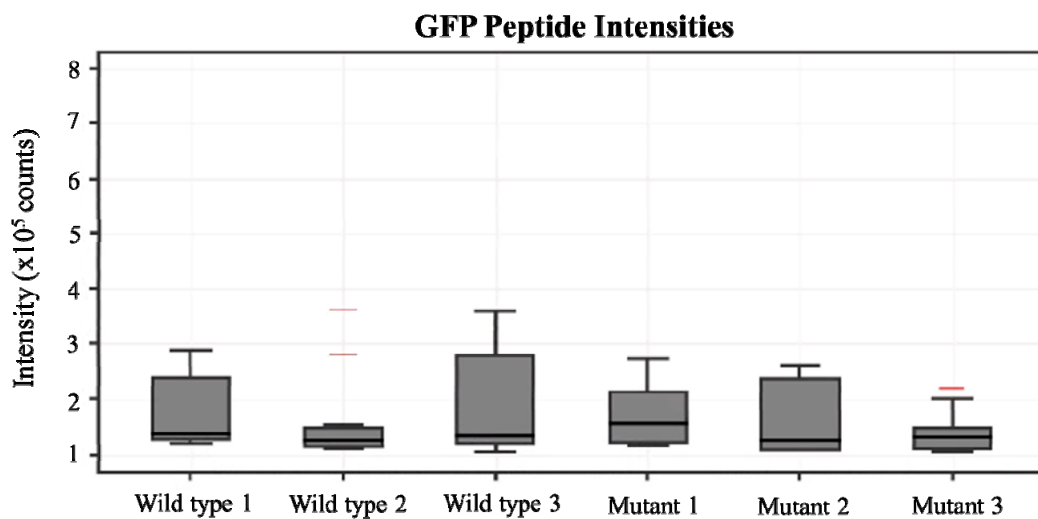

**Figure S1. Intensity of peptides measured for the internal standard (GFP protein).** LC-MS/MS data for each of the wild type and mutant technical replicates was reviewed in order to determine whether intensity normalization was needed between replicates. Here, the intensity for the measured GFP peptides were plotted and it was determined that normalization between samples was not needed as the median intensity was comparable between all replicates.
